# Supplementary material for: A sulfur dioxide Covariance-Based Retrieval Algorithm (COBRA): application to TROPOMI reveals new emission sources
Source: Copernicus journal article supplement (doi:10.5194/acp-21-16727-2021), 2021-11-17
Supplement: Supplementary file 1 [file acp-21-16727-2021-supplement.zip]

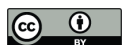

*Supplement of*

## **A sulfur dioxide Covariance-Based Retrieval Algorithm (COBRA): application to TROPOMI reveals new emission sources**

**Nicolas Theys et al.**

*Correspondence to:* Nicolas Theys (theys@aeronomie.be)

- [acp-21-16727-2021-supplement-title-page.pdf](#)
- [Paper\\_S5PSO2\\_COBRA\\_final\\_suppl.pdf](#)
- [S5P\\_COBRA\\_SO2\\_VCD\\_2018\\_04\\_2020\\_12.tif](#)

The copyright of individual parts of the supplement might differ from the article licence.
