# Supplementary material for: A sulfur dioxide Covariance-Based Retrieval Algorithm (COBRA): application to TROPOMI reveals new emission sources
Source: Copernicus journal article supplement (doi:10.5194/acp-21-16727-2021), 2021-11-17
Supplement: Supplementary file 2 [file acp-21-16727-2021-supplement.zip]

Archive with 3 entries (3 files):
- S5P_COBRA_SO2_VCD_2018_04_2020_12.tif
- Paper_S5PSO2_COBRA_final_suppl.pdf
- acp-21-16727-2021-supplement-title-page.pdf
